# Supplementary material
Source: PubMed Central journal article supplement (PMC5033895)
Supplement: jciinsight-1-87535-s001.pdf [file jciinsight-1-87535-s001.pdf]

## SUPPLEMENT

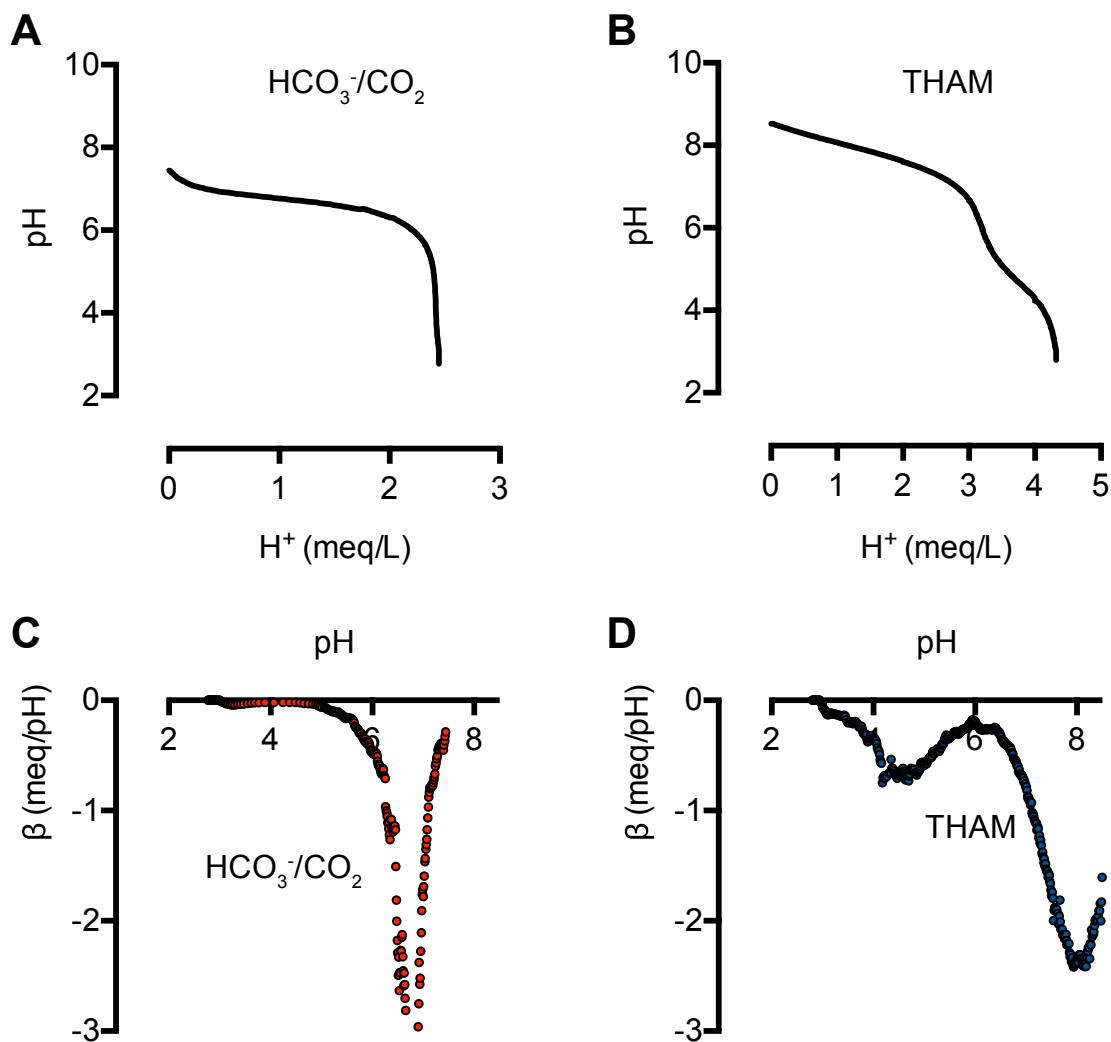**Supp. 1. Buffering capacity of  $\text{HCO}_3^-/\text{CO}_2$  buffer and tromethamine.**

(A and B) Data are acid titration curves and represent drop in pH after addition of acid. **A.**  $\text{HCO}_3^-/\text{CO}_2$  and **B.** tromethamine. (**C and D**) amount of acid (in meq) needed to drop pH by 1 unit or buffering capacity ( $\beta$ ) **C.**  $\text{HCO}_3^-/\text{CO}_2$  and **D.** tromethamine. Results are from a single experiment. Each experiment was repeated at least 3 times with similar results.

**Supp. 2. Demographics and lung function of the subjects that contributed sputum for the in vitro studies**

|               | <b>Age</b> | <b>Gender</b> | <b>FEV1 (L)</b> | <b>Meds</b>                          |
|---------------|------------|---------------|-----------------|--------------------------------------|
| <b>Fig. 1</b> |            |               |                 |                                      |
| <b>1</b>      | 21         | F             | 2.25            | azithromycin                         |
| <b>2</b>      | 41         | F             | 1.21            | azithromycin, colistin               |
| <b>3</b>      | 24         | F             | 0.93            | colistin, minocycline, ciprofloxacin |
| <b>4</b>      | 50         | M             | 1.51            | azithromycin, tobramycin             |
| <b>5</b>      | 44         | M             | 1.73            | azithromycin, tobramycin             |
| <b>6</b>      | 42         | M             | 2.05            | azithromycin                         |
| <b>Fig. 7</b> |            |               |                 |                                      |
| <b>1</b>      | 21         | F             | 0.71            | azithromycin, tobramycin             |
| <b>2</b>      | 57         | F             | 1.64            | azithromycin, cayston                |
| <b>3</b>      | 43         | M             | 1.79            | azithromycin                         |
| <b>4</b>      | 48         | M             | 2.00            | azithromycin                         |
| <b>5</b>      | 44         | M             | 1.31            | azithromycin, colistin               |
| <b>6</b>      | 25         | F             | 2.69            | azithromycin, tobramycin             |
